# Supplementary material
Source: PubMed Central journal article supplement (PMC5636653)
Supplement: NIHMS868784-supplement-Supp_Fig_S3.pdf [file NIHMS868784-supplement-Supp_Fig_S3.pdf]

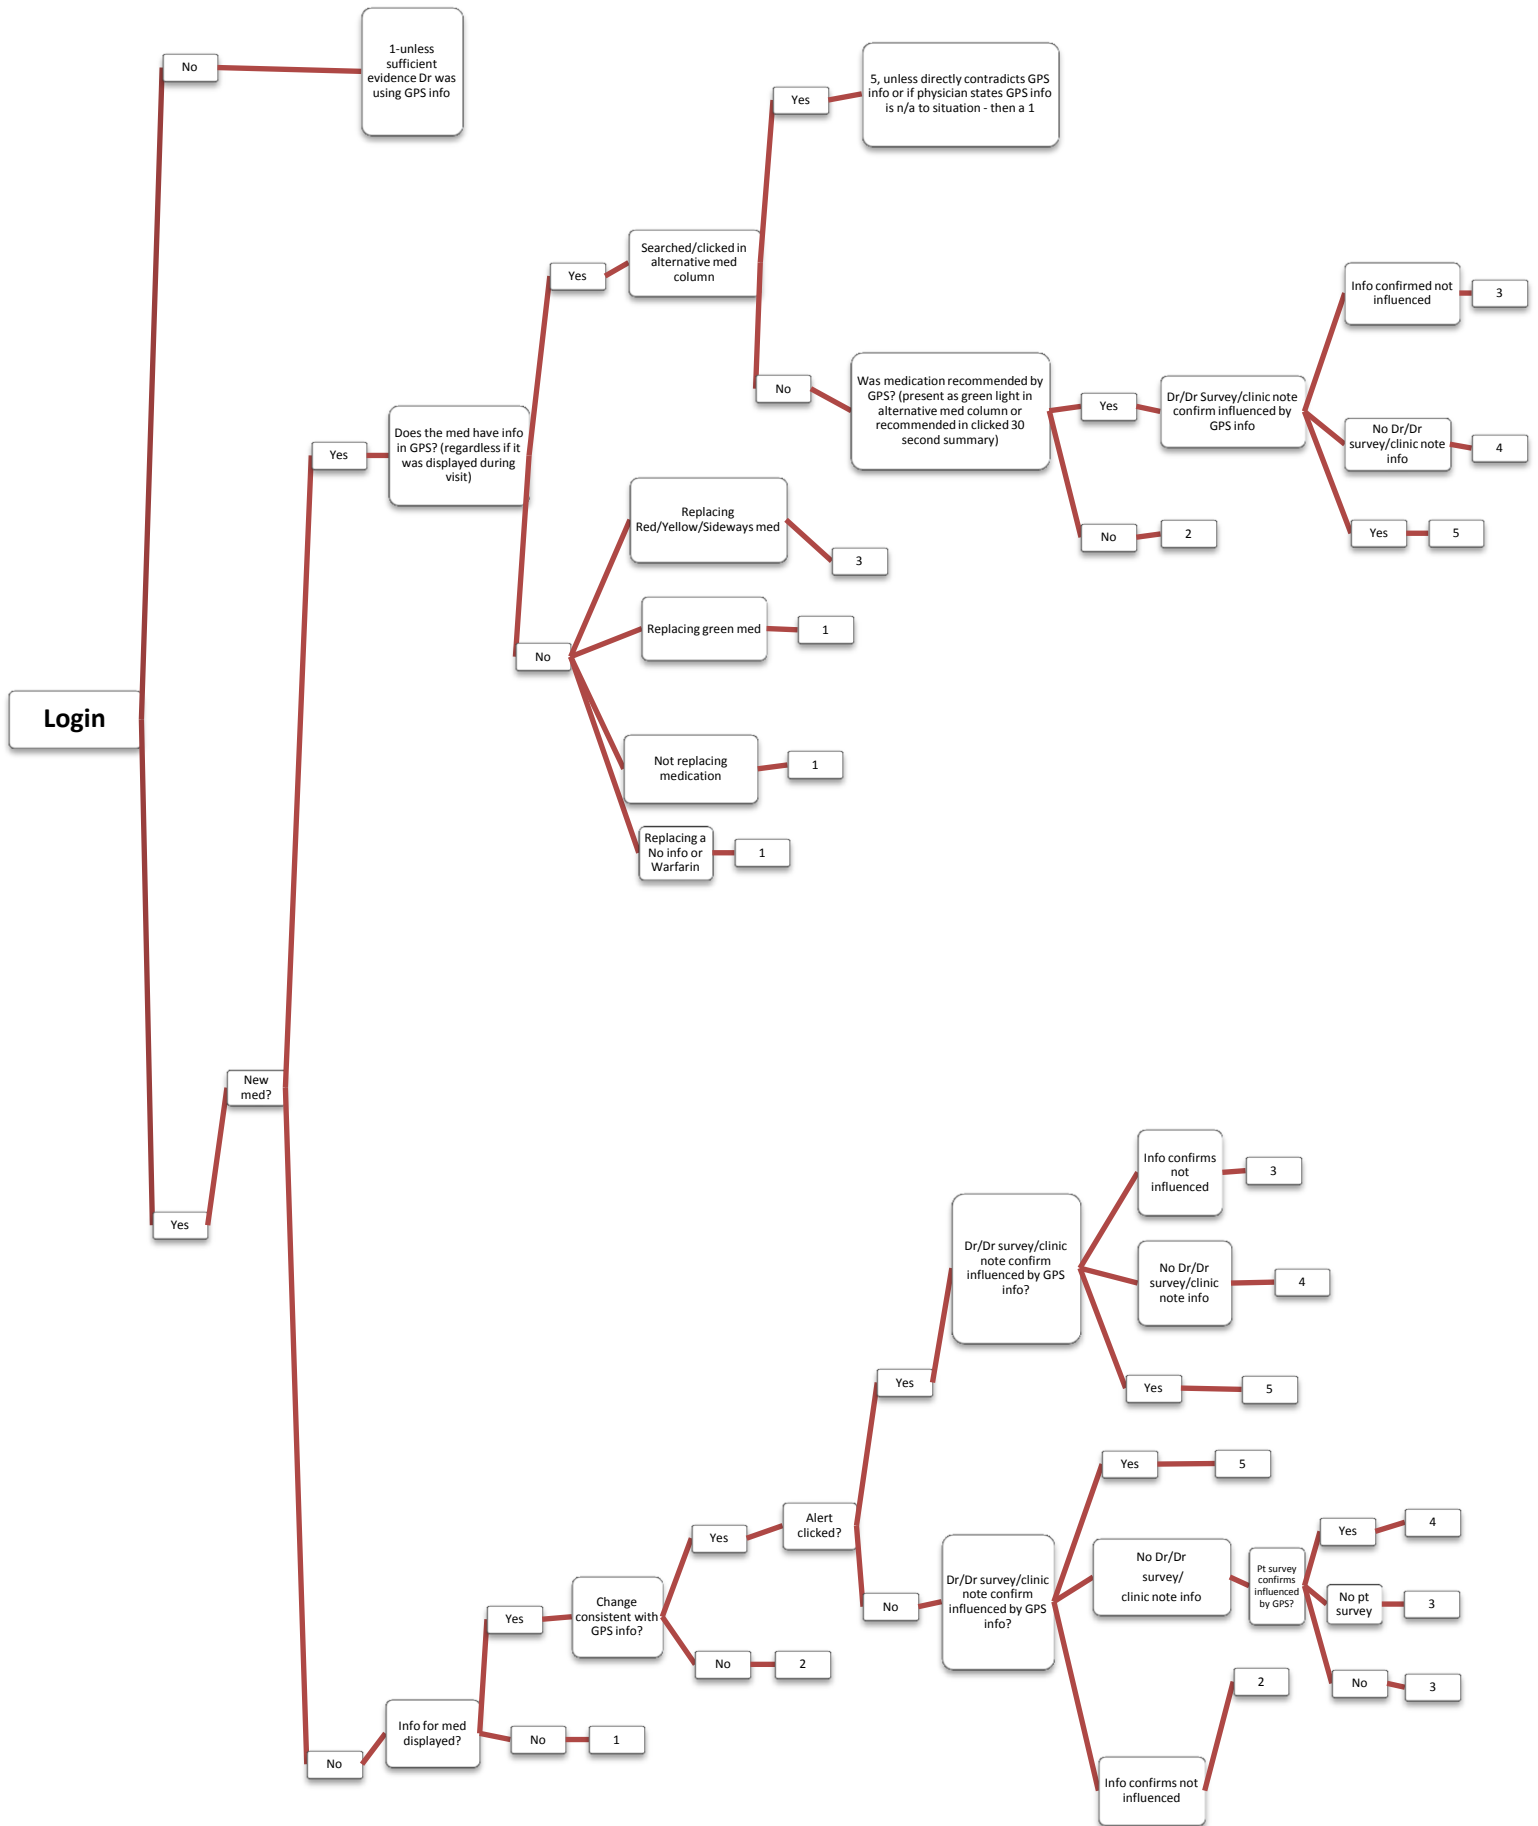

Suppl. Fig. 3

**Supplementary Figure 3. Formal Algorithm for Assigning Attribution of Influence for Medication Changes.** The flow diagram shows the process used to assign attribution (“influence”) scores for each individual medication change throughout the entire study period. In this scoring system, 1 represents a medication change that was “unrelated” to the availability of pharmacogenomic results, 2=“unlikely related”, 3=“possibly related”, 4=“likely related”, and 5=“definitely related”. Physician electronic medical record documentation, Genomic Prescribing System (GPS) click logs, and post-visit physician and patient surveys were used to assign attributions using a standardized, formal process. At least 20% of all final attribution scores were rated by at least two independent raters to ensure agreement ( $\kappa \geq 0.95$ ). Medication changes with scores  $\geq 4$  were categorized as being “influenced by pharmacogenomic information” for all subsequent analyses.
